# Supplementary material for: An Ayurveda Gargle Regimen in Management of Radiotherapy-induced Oral Mucositis
Source: PubMed Central journal article supplement — South Asian J Cancer. 2021 Jun 15;9(4):250–2. doi: 10.1055/s-0041-1726138 (PMC8205557; doi:10.1055/s-0041-1726138), 2021-06-15
Supplement: 10-1055-s-0041-1726138_11_s0115.pdf [file 10-1055-s-0041-1726138_11_s0115.pdf]

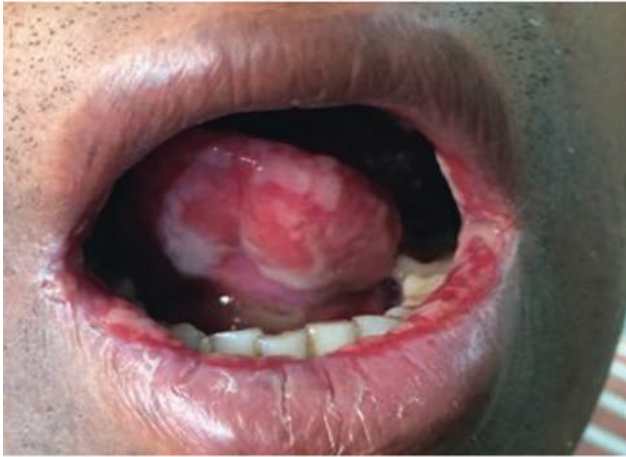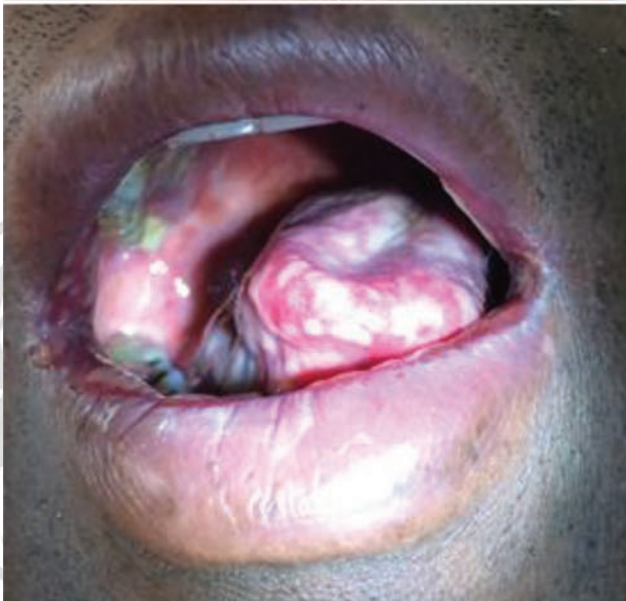

**Supplementary Fig. S1** Radiotherapy-induced oral mucositis (RIOM) in the standard symptomatic care (SSC, control) group.

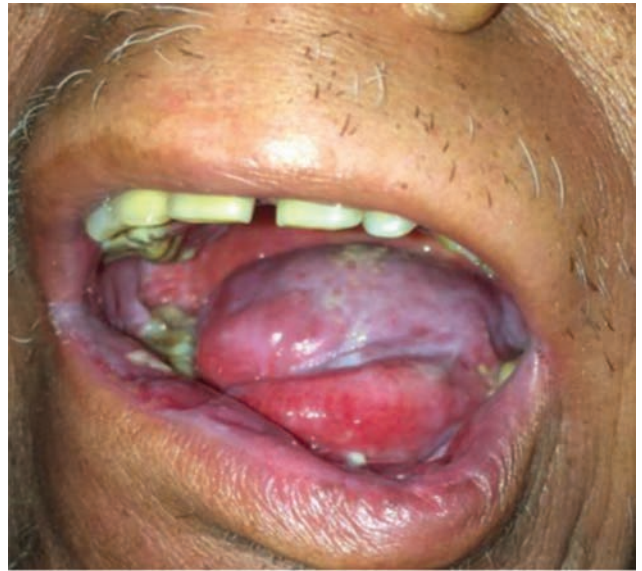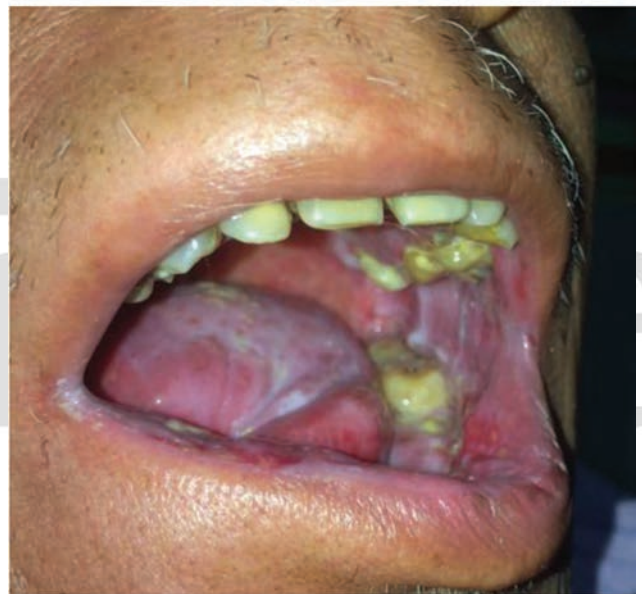

**Supplementary Fig. S2** Radiotherapy-induced oral mucositis (RIOM) in the Ayurveda gargle regimen (AGR; study) group.
